# Supplementary material for: The Power Rainbow: a tool to support 3rd–5th graders in analyzing systems of power
Source: Frontiers journal article supplement (doi:10.3389/feduc.2023.1185685), 2023-11-07
Supplement: Image_3.pdf [file Image_3.pdf]

## Health Justice

| Questions about patients' access to healthcare                                                                                                                                                                                                                                                                                                                      | Questions about how doctors and hospitals have power over patients                                                                                                                                                                                                                                                                                                  | Questions about rules and laws that have to do with access to healthcare and why they exist                                                                                                                                                                                                                                                                                  |
|---------------------------------------------------------------------------------------------------------------------------------------------------------------------------------------------------------------------------------------------------------------------------------------------------------------------------------------------------------------------|---------------------------------------------------------------------------------------------------------------------------------------------------------------------------------------------------------------------------------------------------------------------------------------------------------------------------------------------------------------------|------------------------------------------------------------------------------------------------------------------------------------------------------------------------------------------------------------------------------------------------------------------------------------------------------------------------------------------------------------------------------|
| <ul style="list-style-type: none"> <li>• Have you ever been scared to go to the doctor and if so, why?</li> </ul>                                                                                                                                                                                                                                                   | <ul style="list-style-type: none"> <li>• Have you ever had patients who can't afford healthcare?</li> <li>• If so, have you ever done anything to help patients who can't afford healthcare? What was it?</li> </ul>                                                                                                                                                | <ul style="list-style-type: none"> <li>• Have you heard about the rule/agreement hospitals or doctors offices have with ICE?</li> <li>• Have you done anything to help change that rule/agreement?</li> </ul>                                                                                                                                                                |
| <p><b><i>Who do we want to ask these questions?</i></b></p> <ul style="list-style-type: none"> <li><input type="checkbox"/> People who have been patients before (almost everyone!)</li> <li><input type="checkbox"/> Doctors and other people who work in healthcare</li> <li><input type="checkbox"/> People who make rules and laws about health care</li> </ul> | <p><b><i>Who do we want to ask these questions?</i></b></p> <ul style="list-style-type: none"> <li><input type="checkbox"/> People who have been patients before (almost everyone!)</li> <li><input type="checkbox"/> Doctors and other people who work in healthcare</li> <li><input type="checkbox"/> People who make rules and laws about health care</li> </ul> | <p><b><i>Who do we want to ask these questions?</i></b></p> <ul style="list-style-type: none"> <li><input type="checkbox"/> People who have been patients before (almost everyone!)</li> <li><input type="checkbox"/> People who make rules/laws about how animals are treated</li> <li><input type="checkbox"/> People who make rules and laws about health care</li> </ul> |

## Animal Justice

| Questions about animals in zoos                                                                                                                                                                                                                                                                                                                                                  | Questions about how people and zoos treat animals                                                                                                                                                                                                                                                                                                                                                                          | Questions about rules and laws that have to do with how animals are treated and why they exist                                                                                                                                                                                                                                                                                   |
|----------------------------------------------------------------------------------------------------------------------------------------------------------------------------------------------------------------------------------------------------------------------------------------------------------------------------------------------------------------------------------|----------------------------------------------------------------------------------------------------------------------------------------------------------------------------------------------------------------------------------------------------------------------------------------------------------------------------------------------------------------------------------------------------------------------------|----------------------------------------------------------------------------------------------------------------------------------------------------------------------------------------------------------------------------------------------------------------------------------------------------------------------------------------------------------------------------------|
| <p>Why do you think people have animals in zoos, if they only have small cages or the wrong weather for those animals?</p> <p>Why do you think people keep animals in zoos and take them away from their natural habitat?</p> <p>Why do you think people take animals away from their families?</p>                                                                              | <p>Why are zoos taking animals away from their homes?</p> <p>Why do people take animals and then treat them badly? Is it because they're not human? (We think that animals are treated badly because they're animals.)</p> <p>Have you been to a zoo or a circus?</p> <p>Have you seen animals treated well or poorly?</p> <p>Why would people want to treat animals badly when animals don't do anything bad to them?</p> | <p>Why do you think the animal welfare act only supports mammals and not reptiles or other animals?</p> <p>Why do you think laws protect only some animals?</p>                                                                                                                                                                                                                  |
| <p><b><i>Who do we want to ask these questions?</i></b></p> <ul style="list-style-type: none"> <li><input type="checkbox"/> People who have been to zoos or thought about zoos before (almost everyone!)</li> <li><input type="checkbox"/> People who take care of animals</li> <li><input type="checkbox"/> People who make rules/laws about how animals are treated</li> </ul> | <p><b><i>Who do we want to ask these questions?</i></b></p> <ul style="list-style-type: none"> <li><input type="checkbox"/> People who have been to zoos or thought about zoos before (almost everyone!)</li> <li><input type="checkbox"/> People who take care of animals</li> <li><input type="checkbox"/> People who make rules/laws about how animals are treated</li> </ul>                                           | <p><b><i>Who do we want to ask these questions?</i></b></p> <ul style="list-style-type: none"> <li><input type="checkbox"/> People who have been to zoos or thought about zoos before (almost everyone!)</li> <li><input type="checkbox"/> People who take care of animals</li> <li><input type="checkbox"/> People who make rules/laws about how animals are treated</li> </ul> |
